# Supplementary material for: New Data for Nebivolol after In Silico PK Study: Focus on Young Patients and Dosage Regimen
Source: MDPI journal article supplement (doi:10.3390/pharmaceutics14091911), 2022-09-09
Supplement: s1 [file s1]

Supplementary Materials: New data for Nebivolol after in silico PK study: focus on young patients and dosage regimen

Table S1. Demographic characteristics (mean ± standard deviation) of patients in each clinical study.

| Individual | Age (years) | BMI (kg/m <sup>2</sup> ) | Genotype | Ethnic    | Study Number |
|------------|-------------|--------------------------|----------|-----------|--------------|
| 1          | 34.4        | 26                       | EM       | Caucasian | 1            |
| 2          | 25.7        | 24                       | EM       | Caucasian | 2            |
| 3          | 25.08       | 23.29                    | EM       | Caucasian | 3            |
| 4          | 29.67       | 24.17                    | PM       | Caucasian | 3            |
| 5          | 24.83       | 22.30                    | EM       | Caucasian | 4            |
| 6          | 24.83       | 22.30                    | EM       | Caucasian | 5            |
| 7          | 24          | 23.19                    | IM       | Asian     | 6            |
| 8          | 24          | 20.10                    | IM       | Asian     | 6            |
| 9          | 24          | 21.85                    | IM       | Asian     | 6            |
| 10         | 20          | 20.26                    | IM       | Asian     | 6            |
| 11         | 24          | 21.89                    | IM       | Asian     | 6            |
| 12         | 25          | 22.87                    | EM       | Asian     | 6            |
| 13         | 24          | 19.93                    | IM       | Asian     | 6            |
| 14         | 24          | 20.71                    | EM       | Asian     | 6            |
| 15         | 23          | 19.22                    | EM       | Asian     | 6            |
| 16         | 25          | 21.08                    | IM       | Asian     | 6            |
| 17         | 27          | 20.01                    | EM       | Asian     | 6            |
| 18         | 23          | 19.73                    | IM       | Asian     | 6            |
| 19         | 24          | 21.41                    | EM       | Asian     | 6            |
| 20         | 24          | 21.16                    | EM       | Asian     | 6            |
| 21         | 24          | 22.19                    | EM       | Asian     | 6            |
| 22         | 22          | 19.90                    | EM       | Asian     | 6            |
| 23         | 21          | 22.19                    | IM       | Asian     | 6            |
| 24         | 23          | 22.53                    | EM       | Asian     | 6            |
| 25         | 25          | 20.55                    | EM       | Asian     | 6            |
| 26         | 24          | 23.63                    | EM       | Asian     | 6            |
| 27         | 22          | 22.34                    | EM       | Asian     | 6            |
| 28         | 24          | 21.62                    | IM       | Asian     | 6            |
| 29         | 23          | 21.83                    | IM       | Asian     | 6            |
| 30         | 25          | 21.00                    | IM       | Asian     | 6            |

Table S2. Pharmacokinetics (PK) parameters (mean ± standard deviation) of patients in each clinical study.

| Study Number 1                                 |               |
|------------------------------------------------|---------------|
| PK parameters                                  | n = 26        |
| <i>C</i> <sub>max</sub> (ng.mL <sup>-1</sup> ) | 8.02 ± 3.47   |
| <i>AUC</i> (ng.mL <sup>-1</sup> )              | 41.50 ± 29.76 |

|                                  |                                                 |
|----------------------------------|-------------------------------------------------|
| $T_{max}$ (h)                    | $1.32 \pm 0.67$                                 |
| $K_{el}$ (L/h)                   | ND                                              |
| $t_{1/2}$ (h)                    | $11.03 \pm 2.12$                                |
| <b>Study Number 2</b>            |                                                 |
| <b>PK parameters</b>             | <b>n = 23</b>                                   |
| $C_{max}$ (ng.mL <sup>-1</sup> ) | $1.78 \pm 1.17$                                 |
| AUC (ng.mL <sup>-1</sup> )       | $12.09 \pm 24.51$                               |
| $T_{max}$ (h)                    | $1.37 \pm 0.88$                                 |
| $K_{el}$ (L/h)                   | $0.25 \pm 0.30$                                 |
| $t_{1/2}$ (h)                    | $6.65 \pm 8.55$                                 |
| <b>Study Number 3</b>            |                                                 |
| <b>PK parameters</b>             | <b>n = 43</b>                                   |
| $C_{max}$ (ng.mL <sup>-1</sup> ) | $139.22 \pm 20.80$ (PM)<br>$9.19 \pm 8.91$ (EM) |
| AUC (ng.mL <sup>-1</sup> )       | $5.24 \pm 0.48$ (PM)<br>$1.66 \pm 0.86$ (EM)    |
| $T_{max}$ (h)                    | ND                                              |
| $K_{el}$ (L/h)                   | ND                                              |
| $t_{1/2}$ (h)                    | ND                                              |
| <b>Study Number 4</b>            |                                                 |
| <b>PK parameters</b>             | <b>n = 18</b>                                   |
| $C_{max}$ (ng.mL <sup>-1</sup> ) | $1.67 \pm 0.69$                                 |
| AUC (ng.mL <sup>-1</sup> )       | $10.38 \pm 10.53$                               |
| $T_{max}$ (h)                    | $1.81 \pm 1.19$                                 |
| $K_{el}$ (L/h)                   | $0.13 \pm 0.09$                                 |
| $t_{1/2}$ (h)                    | $7.05 \pm 3.69$                                 |
| <b>Study Number 5</b>            |                                                 |
| <b>PK parameters</b>             | <b>n = 18</b>                                   |

|                                         |               |
|-----------------------------------------|---------------|
| C <sub>max</sub> (ng.mL <sup>-1</sup> ) | 1.67 ± 0.69   |
| AUC (ng.mL <sup>-1</sup> )              | 10.40 ± 10.50 |
| T <sub>max</sub> (h)                    | 1.81 ± 1.19   |
| K <sub>el</sub> (L/h)                   | 0.13 ± 0.09   |
| t <sub>1/2</sub> (h)                    | 7.05 ± 3.69   |

#### Study Number 6

| PK parameters                           | n = 24        |
|-----------------------------------------|---------------|
| C <sub>max</sub> (ng.mL <sup>-1</sup> ) | 2.65 ± 1.33   |
| AUC (ng.mL <sup>-1</sup> )              | 18.21 ± 14.11 |
| T <sub>max</sub> (h)                    | 1.5 ± 0.9     |
| K <sub>el</sub> (L/h)                   | ND            |
| t <sub>1/2</sub> (h)                    | 12.52 ± 5.72  |

C<sub>max</sub> – maximum observed concentration; AUC – area under the curve from the time of dosing to the last measurable positive concentration; T<sub>max</sub> – time of maximum observed concentration; K<sub>el</sub> – elimination rate constant; t<sub>1/2</sub> – half-life time.

**Table S3.** Different basic population pharmacokinetic models of Nebivolol.

| Project name | Compartment | Error model  | BIC     |
|--------------|-------------|--------------|---------|
| PK_N_01      | Two         | Combined 1   | -278.87 |
| PK_N_02      | One         | Combined 1   | 42.83   |
| PK_N_03      | One         | Combined 1   | 128.53  |
| PK_N_04      | Two         | Combined 1   | -170.82 |
| PK_N_05      | Two         | Combined 1   | -275.68 |
| PK_N_06      | Two         | Proportional | -401.07 |
| PK_N_07      | One         | Combined 1   | 51.63   |

BIC: Bayesian information criteria;  $\Delta$ OFV: Based on the BIC values, PK\_N\_06 (yellow) were the selected model for the study, due to their best description of the population pharmacokinetic profile.
